# Supplementary material for: First Report of Two Jaculus Rodents as Potential Reservoir Hosts of Leishmania Parasites in Tunisia
Source: MDPI journal article supplement (doi:10.3390/microorganisms10081502), 2022-07-25
Supplement: s1 [file s1]

## Supplementary Materials

**Supplementary Table S1:** Accession numbers of short and long sequences of Cytochrome b used to identify rodents as belonging to *J. jaculus* and *J. hirtipes*.

| Code   | Long <i>Cytb</i> Sequences [1] | Short <i>Cytb</i> Sequences | Rodent Species     |
|--------|--------------------------------|-----------------------------|--------------------|
| Jac 1  | OL898641                       | MT340265                    | <i>J. jaculus</i>  |
| Jac 2  | OL898644                       | MT340273                    | <i>J. jaculus</i>  |
| Jac 3  | OL898645                       | MT340282                    | <i>J. jaculus</i>  |
| Jac 4  | OL898613                       | MT340292                    | <i>J. hirtipes</i> |
| Jac 5  | OL898628                       | MT340300                    | <i>J. hirtipes</i> |
| Jac 6  | OL898642                       | MT340301                    | <i>J. jaculus</i>  |
| Jac 7  | OL898626                       | MT340302                    | <i>J. hirtipes</i> |
| Jac 8  | OL898627                       | MT340303                    | <i>J. hirtipes</i> |
| Jac 9  | OL898624                       | MT340304                    | <i>J. hirtipes</i> |
| Jac 10 | OL898634                       | MT340266                    | <i>J. jaculus</i>  |
| Jac 11 | OL898616                       | /                           | <i>J. hirtipes</i> |
| Jac 12 | OL898643                       | MT340267                    | <i>J. jaculus</i>  |
| Jac 13 | OL898625                       | /                           | <i>J. hirtipes</i> |
| Jac 14 | OL898621                       | /                           | <i>J. hirtipes</i> |
| Jac 15 | OL898648                       | MT340268                    | <i>J. jaculus</i>  |
| Jac 16 | OL898647                       | MT340269                    | <i>J. jaculus</i>  |
| Jac 17 | OL898617                       | MT340270                    | <i>J. hirtipes</i> |
| Jac 18 | /                              | MT340271                    | <i>J. hirtipes</i> |
| Jac 19 | OL898646                       | MT340272                    | <i>J. jaculus</i>  |
| Jac 20 | OL898631                       | MT340274                    | <i>J. jaculus</i>  |
| Jac 21 | OL898632                       | MT340275                    | <i>J. jaculus</i>  |
| Jac 22 | /                              | MT340276                    | <i>J. hirtipes</i> |
| Jac 23 | OL898615                       | MT340277                    | <i>J. hirtipes</i> |
| Jac 24 | /                              | MT340278                    | <i>J. hirtipes</i> |
| Jac 25 | OL898619                       | /                           | <i>J. hirtipes</i> |
| Jac 26 | /                              | MT340279                    | <i>J. jaculus</i>  |
| Jac 27 | OL898614                       | /                           | <i>J. hirtipes</i> |
| Jac 28 | OL898649                       | MT340280                    | <i>J. jaculus</i>  |
| Jac 29 | OL898633                       | MT340281                    | <i>J. jaculus</i>  |
| Jac 30 | OL898635                       | /                           | <i>J. jaculus</i>  |
| Jac 31 | OL898636                       | MT340283                    | <i>J. jaculus</i>  |
| Jac 32 | OL898622                       | MT340284                    | <i>J. hirtipes</i> |
| Jac 33 | OL898640                       | MT340285                    | <i>J. jaculus</i>  |
| Jac 34 | OL898623                       | MT340286                    | <i>J. hirtipes</i> |
| Jac 35 | OL898620                       | MT340287                    | <i>J. hirtipes</i> |
| Jac 36 | OL898637                       | MT340288                    | <i>J. jaculus</i>  |
| Jac 37 | OL898639                       | MT340289                    | <i>J. jaculus</i>  |
| Jac 38 | OL898638                       | MT340290                    | <i>J. jaculus</i>  |
| Jac 39 | OL898618                       | MT340291                    | <i>J. hirtipes</i> |
| Jac 40 | OL898612                       | MT340293                    | <i>J. hirtipes</i> |
| Jac 41 | OL898611                       | MT340294                    | <i>J. hirtipes</i> |

|        |          |          |                    |
|--------|----------|----------|--------------------|
| Jac 42 | /        | MT340295 | <i>J. hirtipes</i> |
| Jac 43 | OL898610 | MT340296 | <i>J. hirtipes</i> |
| Jac 44 | OL898609 | MT340297 | <i>J. hirtipes</i> |
| Jac 45 | OL898630 | MT340298 | <i>J. jaculus</i>  |
| Jac 46 | OL898629 | MT340299 | <i>J. jaculus</i>  |

## References

1. Ghawar, W.; Chaouch, M.; Ben Abderrazak, S.; Snoussi, M.A.; Salem, S.; Chouchen, S.; Bouaoun, A.; Ben Salah, A.; Bettaieb, J. Evaluation of the Taxonomic Status of Lesser Egyptian Jerboa, *Jaculus jaculus*: First Description of New Phylogroups in Tu-nisia. *Animals* **2022**, *12*, 758. <https://doi.org/10.3390/ani12060758>.

**Supplementary Table S2:** Accessions number of Tunisian *Leishmania* sequences, their hosts, locations and haplotypes.

| Accessions Numbers | Species                    | Host                       | Location    | Haplotypes (Figure 5) |
|--------------------|----------------------------|----------------------------|-------------|-----------------------|
| KY963123           | <i>Leishmania infantum</i> | <i>Psammomys obesus</i>    | Sidi Bouzid | Hap 1                 |
| KY963124           |                            | <i>Psammomys obesus</i>    | Sidi Bouzid |                       |
| KY963125           |                            | <i>Psammomys obesus</i>    | Sidi Bouzid |                       |
| KY963126           |                            | <i>Psammomys obesus</i>    | Sidi Bouzid |                       |
| KY963127           |                            | <i>Psammomys vexilaris</i> | Kebili      |                       |
| KY963128           |                            | <i>Psammomys vexilaris</i> | Kebili      |                       |
| KY963129           |                            | <i>Psammomys vexilaris</i> | Kebili      |                       |
| MF597933           |                            | Sand flies                 | Zagouan     |                       |
| MF597934           |                            | Sand flies                 | Zagouan     |                       |
| MF693883           |                            | Dog                        | Tunis       |                       |
| MF693885           |                            | Dog                        | Tunis       |                       |
| MF693886           |                            | Dog                        | Tunis       |                       |
| MF693887           |                            | Dog                        | Tunis       |                       |
| MF693888           |                            | Dog                        | Tunis       |                       |
| MF693889           |                            | Dog                        | Tunis       |                       |
| MH686281           |                            | Sand flies                 | Monastir    |                       |
| MH997874           |                            | Dog                        | Tunis       |                       |
| MH997875           |                            | Dog                        | Tunis       |                       |
| MH997876           |                            | Dog                        | Tunis       |                       |
| MK474640           |                            | Sand flies                 | Kairouan    |                       |
| MK474641           |                            | Sand flies                 | Kairouan    |                       |
| MK474642           |                            | Human                      | Kairouan    |                       |
| KY963122           | <i>Leishmania major</i>    | <i>Psammomys obesus</i>    | Sidi Bouzid | Hap 6                 |
| MF693884           |                            | Dog                        | Tunis       | Hap 5                 |
| FN677342           |                            | Human                      | Sfax        | Hap 2                 |
| MK463621           |                            | Sand flies                 | Kairouan    |                       |
| MK463622           |                            | Sand flies                 | Kairouan    |                       |
| MK463623           |                            | Sand flies                 | Kairouan    |                       |
| MK463625           |                            | Sand flies                 | Kairouan    |                       |
| MK463626           |                            | Sand flies                 | Kairouan    |                       |
| MK463627           |                            | Sand flies                 | Kairouan    |                       |
| MK463628           |                            | Sand flies                 | Kairouan    |                       |
| MK463629           |                            | Human                      | Kairouan    |                       |
| MW058081 (jac16)   |                            | <i>Jaculus jaculus</i>     | Tataouine   |                       |
| MW058076 (jac11)   |                            | <i>Jaculus hirtipes</i>    | Tataouine   |                       |
| MW058078 (jac13)   |                            | <i>Jaculus hirtipes</i>    | Tataouine   |                       |
| MW058079 (jac14)   |                            | <i>Jaculus hirtipes</i>    | Tataouine   |                       |
| MW058082 (jac17)   |                            | <i>Jaculus hirtipes</i>    | Tataouine   |                       |
| MW058083 (jac18)   |                            | <i>Jaculus hirtipes</i>    | Tataouine   |                       |
| MW058085 (jac20)   |                            | <i>Jaculus jaculus</i>     | Tataouine   |                       |
| MW058088 (jac35)   |                            | <i>Jaculus hirtipes</i>    | Tataouine   |                       |
| MW058069 (jac4)    |                            | <i>Jaculus hirtipes</i>    | Tataouine   |                       |

|                  |                                                     |            |       |
|------------------|-----------------------------------------------------|------------|-------|
| MW058070 (jac5)  | <i>Jaculus hirtipes</i>                             | Tataouine  |       |
| MW058072 (jac7)  | <i>Jaculus hirtipes</i>                             | Tataouine  |       |
| MW058073 (jac8)  | <i>Jaculus hirtipes</i>                             | Tataouine  |       |
| MW058074 (jac9)  | <i>Jaculus hirtipes</i>                             | Tataouine  |       |
| MW058084 (jac19) | <i>Jaculus jaculus</i>                              | Tataouine  |       |
| MW058066 (jac1)  | <i>Jaculus jaculus</i>                              | Tataouine  |       |
| MW058075 (jac10) | <i>Jaculus jaculus</i>                              | Tataouine  |       |
| MW058077 (jac12) | <i>Jaculus jaculus</i>                              | Tataouine  |       |
| MW058080 (jac15) | <i>Jaculus jaculus</i>                              | Tataouine  |       |
| MW058067 (jac2)  | <i>Jaculus jaculus</i>                              | Tataouine  |       |
| MW058068 (jac3)  | <i>Jaculus jaculus</i>                              | Tataouine  |       |
| MW058071 (jac6)  | <i>Jaculus jaculus</i>                              | Tataouine  |       |
| JN242001         | <i>Ctenodactylus gundi</i>                          | Metlaoui   | Hap 7 |
| MK463624         | Sand flies                                          | Kairouan   | Hap 3 |
| AJ300485         | Human                                               | Tataouine  |       |
| JF719995         | <i>Ctenodactylus gundi</i>                          | Tataouine  |       |
| JF719996         | <i>Ctenodactylus gundi</i>                          | Metlaoui   |       |
| JN104588         | Sand flies                                          | Tataouine  |       |
| KY963130         | <i>Psammomys vexilaris</i>                          | Kebili     |       |
| KY963131         | <i>Psammomys vexilaris</i>                          | Kebili     |       |
| KY963132         | <i>Psammomys vexilaris</i>                          | Kebili     |       |
| MK474646         | <i>Leishmania tropica</i><br>( <i>L. killicki</i> ) | Sand flies | Hap 4 |
| MK474647         |                                                     | Sand flies |       |
| MK474648         |                                                     | Sand flies |       |
| MK474649         |                                                     | Sand flies |       |
| MK474651         |                                                     | Sand flies |       |
| MK474652         |                                                     | Sand flies |       |
| MW058086 (jac34) | <i>Jaculus hirtipes</i>                             | Tataouine  |       |
| MW058087 (jac43) | <i>Jaculus hirtipes</i>                             | Tataouine  |       |
| MK474653         | Human                                               | Kairouan   | Hap 8 |
| MK474650         | Sand flies                                          | Kairouan   | Hap 9 |

**Supplementary Table S3:** Accessions number of *Leishmania* sequences detected from rodent all over the world, their hosts, locations and haplotypes.

| Accessions Numbers | Species                    | Host                       | Location | Haplotypes<br>(Figure 6) |
|--------------------|----------------------------|----------------------------|----------|--------------------------|
| MF977313           | <i>Leishmania infantum</i> | <i>Mus musculus</i>        | Morocco  | Hap 16                   |
| MF977314           |                            | <i>Rattus rattus</i>       | Morocco  |                          |
| MF977315           |                            | <i>Rattus norvegicus</i>   | Morocco  |                          |
| JX151015           |                            | <i>Rhombomys opimus</i>    | Iran     |                          |
| KY963123           |                            | <i>Psammomys obesus</i>    | Tunisia  |                          |
| KY963124           |                            | <i>Psammomys obesus</i>    | Tunisia  | Hap 18                   |
| KY963126           |                            | <i>Psammomys obesus</i>    | Tunisia  |                          |
| KY963127           |                            | <i>Psammomys vexilaris</i> | Tunisia  |                          |
| KY963122           |                            | <i>Psammomys obesus</i>    | Tunisia  | Hap 19                   |
| KY963125           |                            | <i>Psammomys obesus</i>    | Tunisia  |                          |
| KY963129           | <i>Leishmania major</i>    | <i>Psammomys vexilaris</i> | Tunisia  |                          |
| KY963128           |                            | <i>Psammomys vexilaris</i> | Tunisia  |                          |
| JN860730           |                            | <i>Rhombomys opimus</i>    | Iran     | Hap 12                   |
| JN860731           |                            | <i>Rhombomys opimus</i>    | Iran     |                          |
| JN860732           |                            | <i>Rhombomys opimus</i>    | Iran     |                          |
| JN860734           |                            | <i>Rhombomys opimus</i>    | Iran     |                          |
| JN860735           |                            | <i>Rhombomys opimus</i>    | Iran     |                          |
| JN860736           |                            | <i>Rhombomys opimus</i>    | Iran     |                          |
| JN860739           |                            | <i>Rhombomys opimus</i>    | Iran     |                          |
| JN860740           |                            | <i>Rhombomys opimus</i>    | Iran     |                          |
| JN860741           |                            | <i>Rhombomys opimus</i>    | Iran     |                          |
| JN860742           |                            | <i>Rhombomys opimus</i>    | Iran     |                          |
| JN860745           |                            | <i>Rhombomys opimus</i>    | Iran     |                          |
| JN860746           |                            | <i>Rhombomys opimus</i>    | Iran     |                          |
| JN860754           |                            | <i>Rhombomys opimus</i>    | Iran     |                          |
| JN860757           |                            | <i>Rhombomys opimus</i>    | Iran     |                          |
| KJ194177           |                            | <i>Meriones libycus</i>    | Iran     |                          |
| KJ194178           |                            | <i>Meriones libycus</i>    | Iran     |                          |
| KJ194179           |                            | <i>Meriones libycus</i>    | Iran     |                          |
| KJ194180           |                            | <i>Meriones libycus</i>    | Iran     |                          |
| KJ194181           |                            | <i>Meriones libycus</i>    | Iran     |                          |
| KJ577703           |                            | <i>Rhombomys opimus</i>    | Iran     | Hap 17                   |
| KJ577704           |                            | <i>Rhombomys opimus</i>    | Iran     |                          |
| KJ577705           |                            | <i>Rhombomys opimus</i>    | Iran     |                          |
| KJ577706           |                            | <i>Rhombomys opimus</i>    | Iran     |                          |
| KJ577707           |                            | <i>Rhombomys opimus</i>    | Iran     |                          |
| KJ577708           |                            | <i>Rhombomys opimus</i>    | Iran     |                          |
| KF152937           |                            | <i>Meriones libycus</i>    | Iran     |                          |

|                  |                            |         |        |
|------------------|----------------------------|---------|--------|
| MW058081 (jac16) | <i>Jaculus jaculus</i>     | Tunisia |        |
| MW058076 (jac11) | <i>Jaculus hirtipes</i>    | Tunisia |        |
| MW058078 (jac13) | <i>Jaculus hirtipes</i>    | Tunisia |        |
| MW058079 (jac14) | <i>Jaculus hirtipes</i>    | Tunisia |        |
| MW058082 (jac17) | <i>Jaculus hirtipes</i>    | Tunisia |        |
| MW058083 (jac18) | <i>Jaculus hirtipes</i>    | Tunisia |        |
| MW058085 (jac20) | <i>Jaculus jaculus</i>     | Tunisia |        |
| MW058088 (jac35) | <i>Jaculus hirtipes</i>    | Tunisia |        |
| MW058069 (jac4)  | <i>Jaculus hirtipes</i>    | Tunisia |        |
| MW058070 (jac5)  | <i>Jaculus hirtipes</i>    | Tunisia |        |
| MW058072 (jac7)  | <i>Jaculus hirtipes</i>    | Tunisia |        |
| MW058073 (jac8)  | <i>Jaculus hirtipes</i>    | Tunisia |        |
| MW058074 (jac9)  | <i>Jaculus hirtipes</i>    | Tunisia |        |
| MW058084 (jac19) | <i>Jaculus jaculus</i>     | Tunisia |        |
| MW058066 (jac1)  | <i>Jaculus jaculus</i>     | Tunisia |        |
| MW058075 (jac10) | <i>Jaculus jaculus</i>     | Tunisia |        |
| MW058077 (jac12) | <i>Jaculus jaculus</i>     | Tunisia |        |
| MW058080 (jac15) | <i>Jaculus jaculus</i>     | Tunisia |        |
| MW058067 (jac2)  | <i>Jaculus jaculus</i>     | Tunisia |        |
| MW058068 (jac3)  | <i>Jaculus jaculus</i>     | Tunisia |        |
| MW058071 (jac6)  | <i>Jaculus jaculus</i>     | Tunisia |        |
| JN242001         | <i>Ctenodactylus gundi</i> | Tunisia | Hap 11 |
| JN860737         | <i>Rhombomys opimus</i>    | Iran    | Hap 13 |
| JN860738         | <i>Rhombomys opimus</i>    | Iran    | Hap 14 |
| JN860750         | <i>Rhombomys opimus</i>    | Iran    | Hap 15 |
| JF719995         | <i>Ctenodactylus gundi</i> | Tunisia |        |
| JF719996         | <i>Ctenodactylus gundi</i> | Tunisia |        |
| KY963130         | <i>Psammomys vexilaris</i> | Tunisia |        |
| KY963131         | <i>Psammomys vexilaris</i> | Tunisia | Hap 10 |
| KY963132         | <i>Psammomys vexilaris</i> | Tunisia |        |
| MW058086 (jac34) | <i>Jaculus hirtipes</i>    | Tunisia |        |
| MW058087 (jac43) | <i>Jaculus hirtipes</i>    | Tunisia |        |
| MF977312         | <i>Mus musculus</i>        | Morocco | Hap 20 |
